# Supplementary material for: Water soluble fluorophore-carbazole–Au–DNA nanohybrid: enhanced two-photon absorption for living cell imaging application
Source: Royal Society of Chemistry journal article supplement (doi:10.1039/c5ra13791h), 2015-01-01
Supplement: c5ra13791h1.pdf [file c5ra13791h1.pdf]

Supporting information for:

## Water soluble fluorophore-carbazole-Au-DNA nanohybrid: enhanced two-photon absorption for living cell imaging application

Shu-juan Zhu, Lin Kong\*, Hui Wang, Yu-peng Tian, Sheng-li Li, Zhao-ming Xue, Xian-yun Xu and Jia-xiang Yang

### Contents:

1. Synthesis process of compound a-c
2. SEM and TEM images
3. Linear optical properties of L-Au nanohybrid prepared without ct-DNA
4. Schematic molecular arrangement of the L-Au-DNA hybrid
5. Cyclic-voltammetric response of carbazole and  $\text{HAuCl}_4$
6. FT-IR and Raman scattering spectra of L-Au and L-Au-DNA nanohybrids
7. One-photon and two-photon images of HepG2 cells incubated with **L** after 4 hours of incubation.
8. One-photon and two-photon images of HepG2 cells incubated with **L-Au-DNA** after 2 hours of incubation.

#### Synthesis of the compound **a**

9-hexyl-9H-carbazole-3-carbaldehyde (2.80 g, 0.01 mol) and sodium borohydride (0.76 g, 0.02 mol) were dissolved in methanol (20 mL), and the mixture was refluxed for 6 h with stirring. The compound **a** was collected by evaporating the solvent methanol.

#### Synthesis of the compound **b**

**a** (2.80 g, 0.01 mol) and triphenylphosphine (3.9 g, 0.015 mol) were dissolved in chloroform (30 mL). Potassium iodide (1.70 g, 0.01 mol) was dissolved in water (1 mL), which was added into the above solution along with glacial acetic acid (5 mL) and 18C6 (10 mg). The mixture was stirred for a week and some precipitate appeared. Then, The precipitate was collected by pouring the mixture into 1,4-dimethylbenzene to get white-yellow powder **b**.

#### Synthesis of the compound **c**

**b** (0.65 g, 1.0 mmol) and 1,4-phthalaldehyde (0.13 g, 1.0 mmol) were dissolved in *N,N*-dimethylformamide (5 mL), the mixture was stirred for 12 h. The reaction was monitored by TLC to ensure complete reaction. The mixture was poured into dichloromethane (500 mL) and extracted four times with water (100 mL for each). The organic layer was separated off and dried with anhydrous  $\text{Na}_2\text{SO}_4$ , filtered, the crude product was purified by silica gel column chromatography (petroleum ether: ethyl acetate = 50 : 1) to yield a light yellow power **c**.  $^1\text{H}$  NMR(400 MHz,  $\text{CDCl}_3$ ):  $\delta$ (ppm) 10.04 (s, 1H); 8.52 (d, 1H); 8.25 (d, 1H,  $J = 7.6$  Hz); 7.98 (d, 2H,  $J = 8.4$  Hz); 7.90 (d, 2H,  $J = 8.4$  Hz); 7.87 (d, 1H,  $J = 8.4$  Hz); 7.74~7.01 (d, 1H,  $J = 16.3$  Hz), 7.68 (t, 2H,  $J = 8.5$  Hz); 7.54 (t, 1H,  $J = 7.2$  Hz); 7.47~7.23 (d, 1H,  $J = 16.3$  Hz); 7.29 (t, 1H,  $J = 7.2$  Hz); 4.46 (t, 2H,  $J = 7.2$  Hz); 1.84 (m, 2H); 1.34 (m, 6H); 0.87 (m, 3H,  $J = 6.8$  Hz).

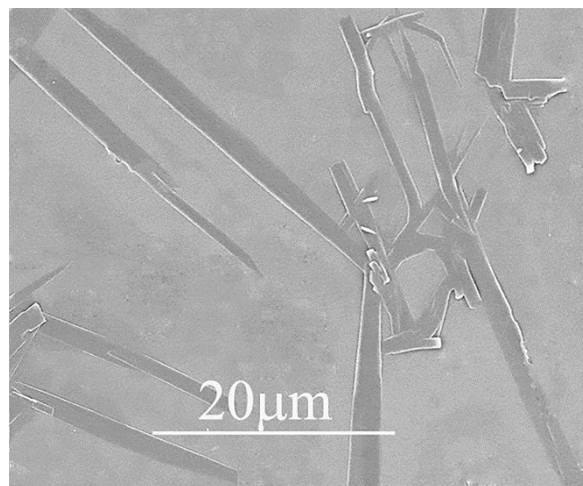

Figure S1 SEM image of **L** nanostructure

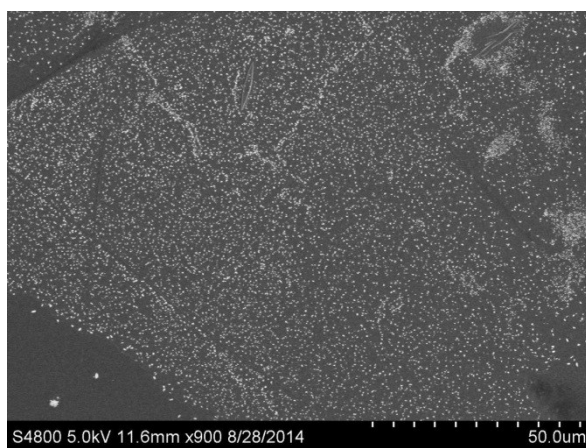

Figure S2 SEM of **L**-Au-DNA nanohybrid

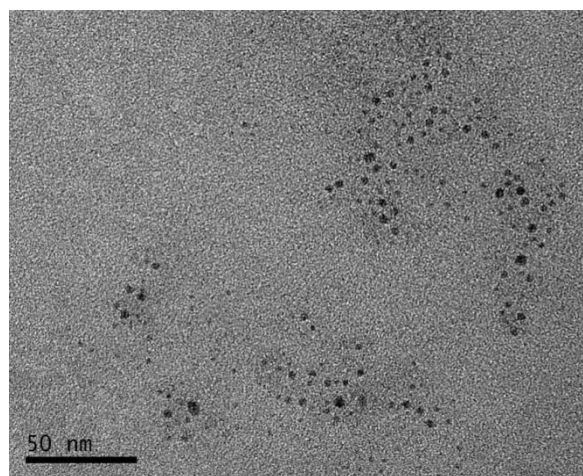

Figure S3 TEM of **L**-Au-DNA nanohybrid

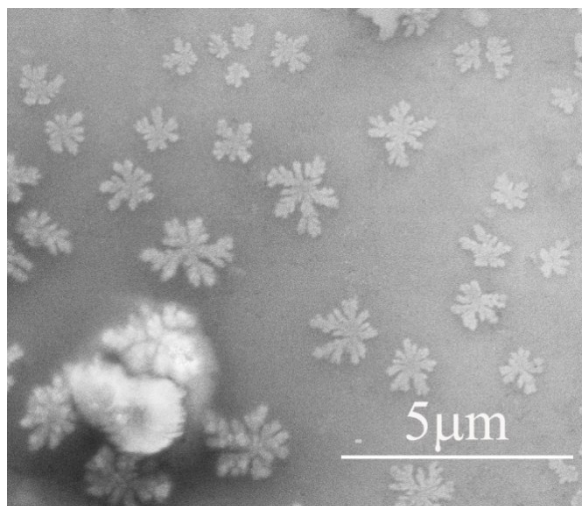

Figure S4 SEM image of **L-Au** hybrid prepared without ct-DNA

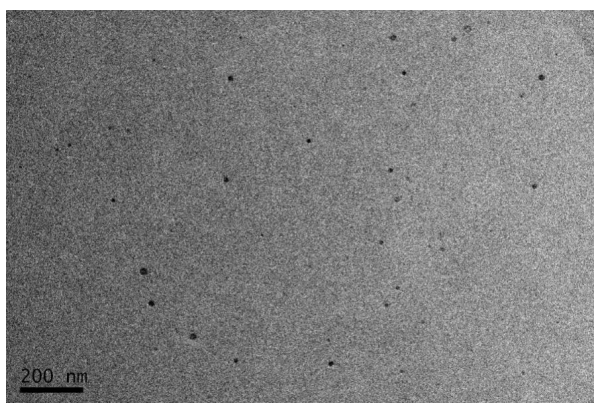

Figure S5 TEM image of pure Au nanopartilces prepared without **L** and ct-DNA

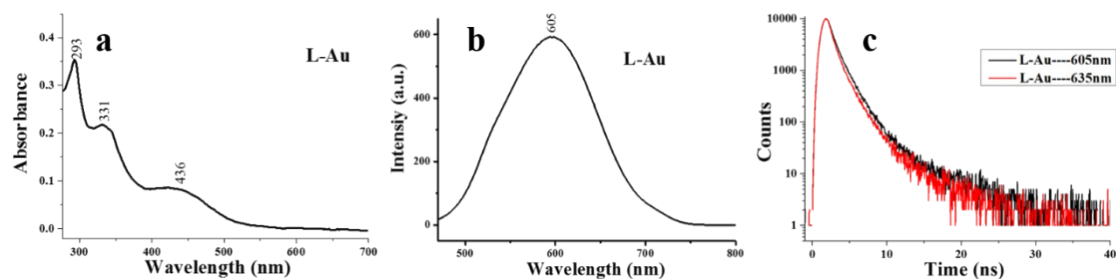

**Figure S6** (a) UV-vis absorbance, (b) fluorescence emission and (c) FL lifetime (detected at 605 nm and 635 nm, respectively) spectra of **L-Au** nanohybrid prepared without ct-DNA

|             | $\lambda$ (nm) | $\tau_1$ (ns) | $A_1$ (%) | $\tau_2$ (ns) | $A_2$ (%) | $\tau_3$ (ns) | $A_3$ (%) | $\bar{\tau}$ (ns) | $\chi^2$ | $\phi_{ET}$ (%) |
|-------------|----------------|---------------|-----------|---------------|-----------|---------------|-----------|-------------------|----------|-----------------|
| <b>L-Au</b> | 605            | 0.51          | 68        | 1.53          | 31        | 5.86          | 1         | 0.85              | 0.97     | 56.4            |
|             | 635            | 0.48          | 77        | 1.45          | 22        | 4.47          | 1         | 0.72              | 1.08     |                 |

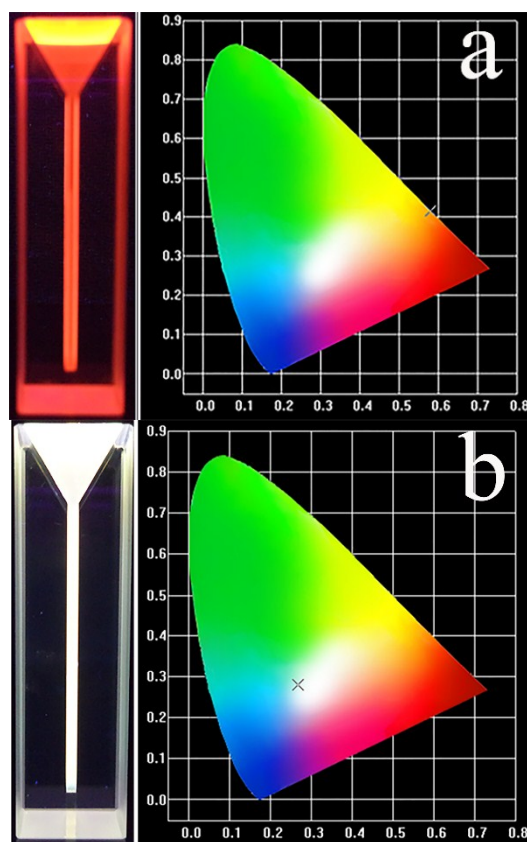

Figure S7 (a) Chromaticity diagram (CIE) of fluorescence emission of **L** and photo of it under 365 nm UV light; (b) Chromaticity diagram (CIE) of fluorescence emission of **L-Au-DNA** nanohybrid and photo of it under 365 nm UV light.

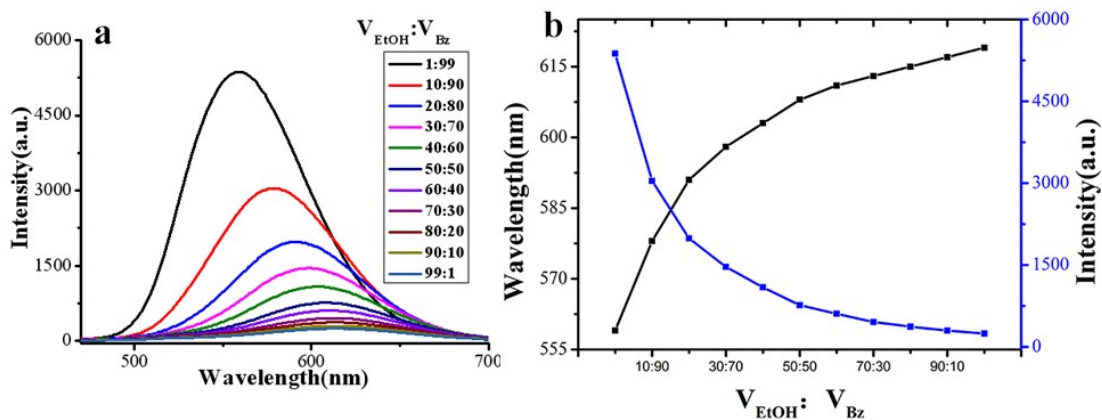

Figure S8 (a) PL emission spectra changes of **L** ( $1.0 \times 10^{-4} \text{ mol} \cdot \text{L}^{-1}$ ) in EtOH-benzene mixtures with different volume ratios; (b) the effect of volume ratio of EtOH to benzene on the maximum emission intensity and wavelength of **L** in EtOH-benzene with the concentration being  $1.0 \times 10^{-4} \text{ mol L}^{-1}$ .

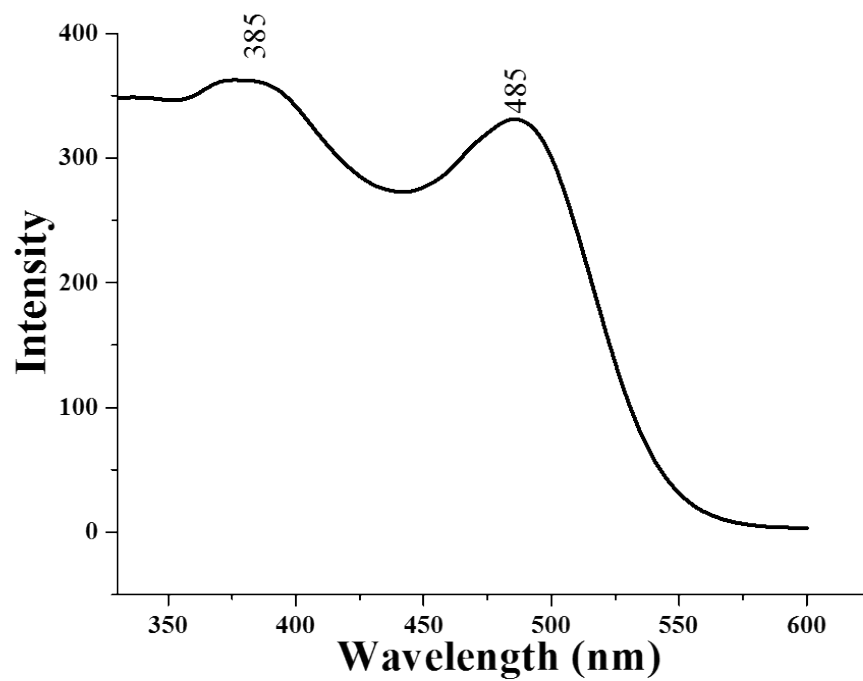

Figure S9 Excitation spectrum of L

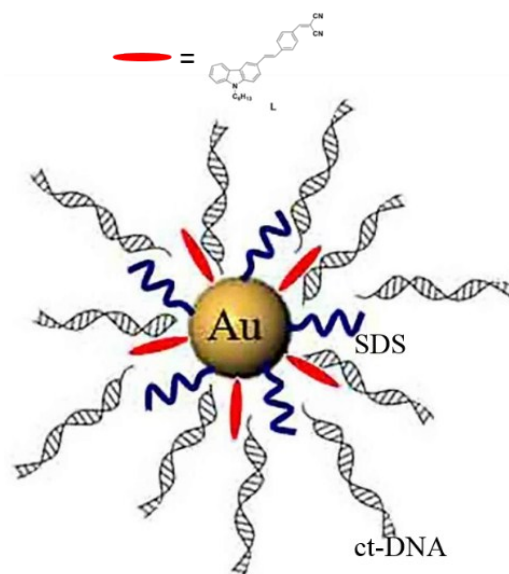

Figure S10 A schematic molecular arrangement of the L-Au-DNA hybrid

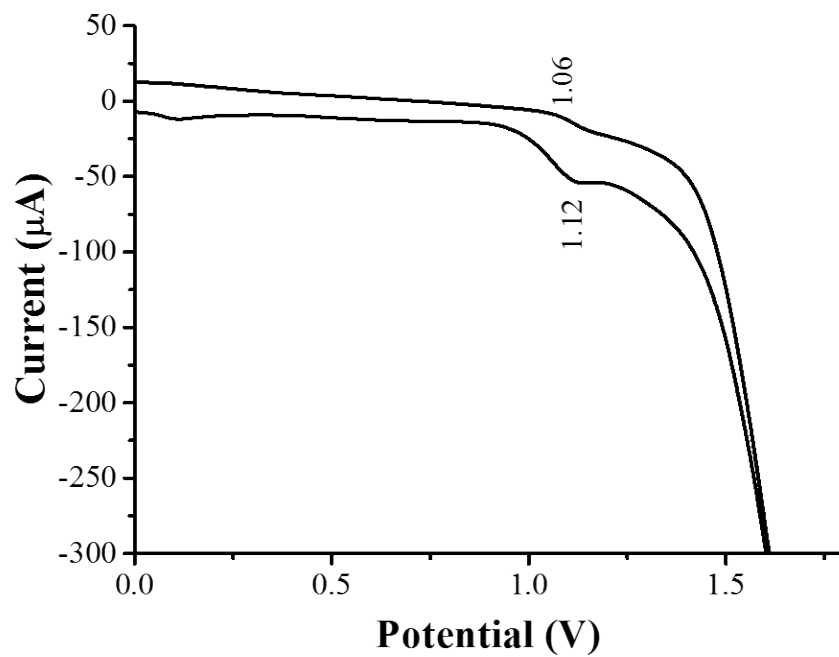

Figure S11 Cyclic-voltammetric response of carbazole in the presence of 0.1 M TBAP *Vs.* Ag/AgCl at room temperature. Scan rate: 100 mV/s

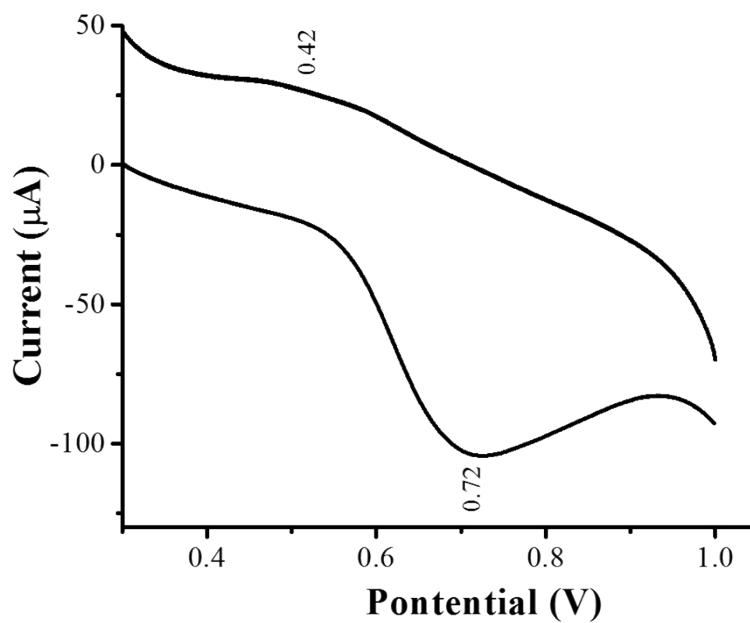

Figure S12 Cyclic-voltammetric response of  $\text{H[AuCl}_4\text{]}$  in the presence of 0.1 M TBAP *Vs.* Ag/AgCl at room temperature. Scan rate: 100 mV/s

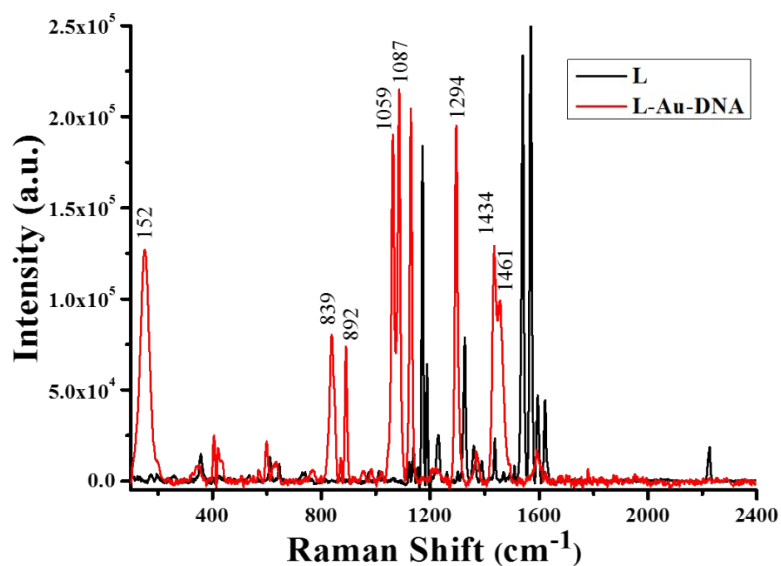

Figure S13 Raman spectra of **L** and **L-Au-DNA** nanohybrid

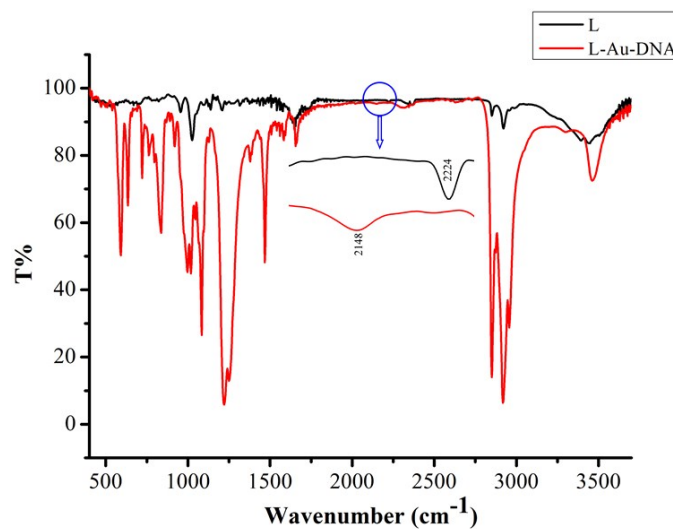

Figure S14 FT-IR spectra of **L** and **L-Au-DNA** hybrid

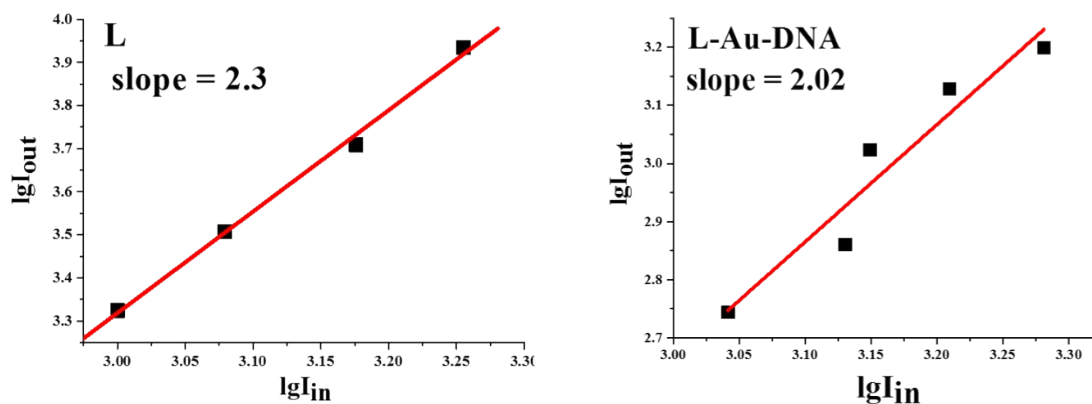

Figure S15 The logarithmic plots of the output two-photon excited fluorescence ( $I_{out}$ ) vs the square of input laser ( $I_{in}$ ) of **L** and **L-Au-DNA** nanohybrid, respectively.

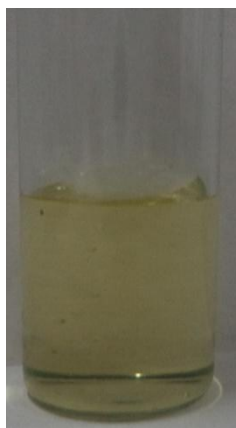

Figure S16 The photo of L-Au-DNA nanohybrid in water solution

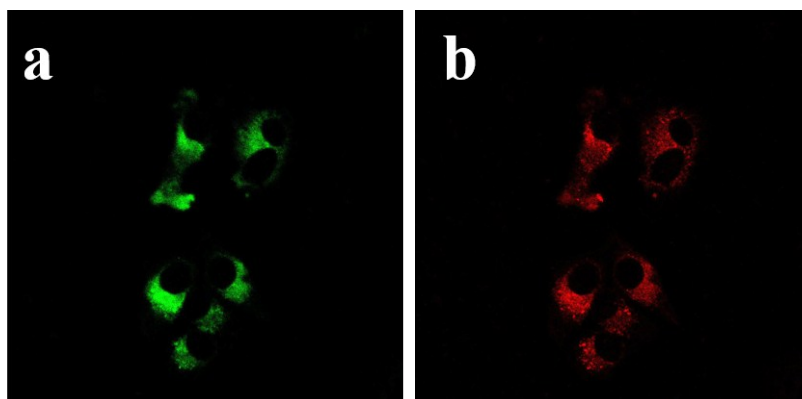

**Figure S17** (a) One-photon image ( $\lambda_{\text{ex}} = 450$  nm, emission wavelength from 600 to 650 nm), (b) two-photon image of HepG2 cells incubated with 10  $\mu\text{M}$  of **L** ( $\lambda_{\text{ex}} = 880$  nm, emission wavelength from 610 to 660 nm), after 4 hours of incubation, washed by PBS buffer. The scale bar was 20  $\mu\text{m}$ .

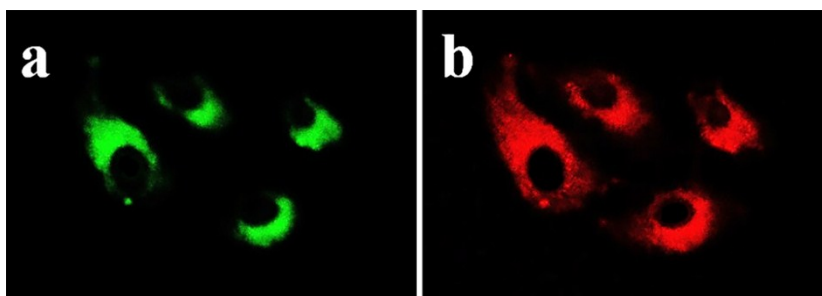

**Figure S18** (a) One-photon image ( $\lambda_{\text{ex}} = 420$  nm, emission wavelength from 530 to 580 nm), (b) two-photon image of HepG2 cells incubated with 10  $\mu\text{M}$  of the L-Au-DNA nanohybrid ( $\lambda_{\text{ex}} = 800$  nm, emission wavelength from 550 to 600 nm), after 2 hours of incubation, washed by PBS buffer. The scale bar was 20  $\mu\text{m}$ .
